# Supplementary material for: Correction of TRMM 3B42V7 Based on Linear Regression Models over China
Source: Hindawi journal article supplement (doi:10.1155/2016/3103749), 2016-01-01

## 1 Linear Regression Model construction

TRMM precipitation from 1998 to 2013

Gauge precipitation from 1998 to 2013  
(not available to public)

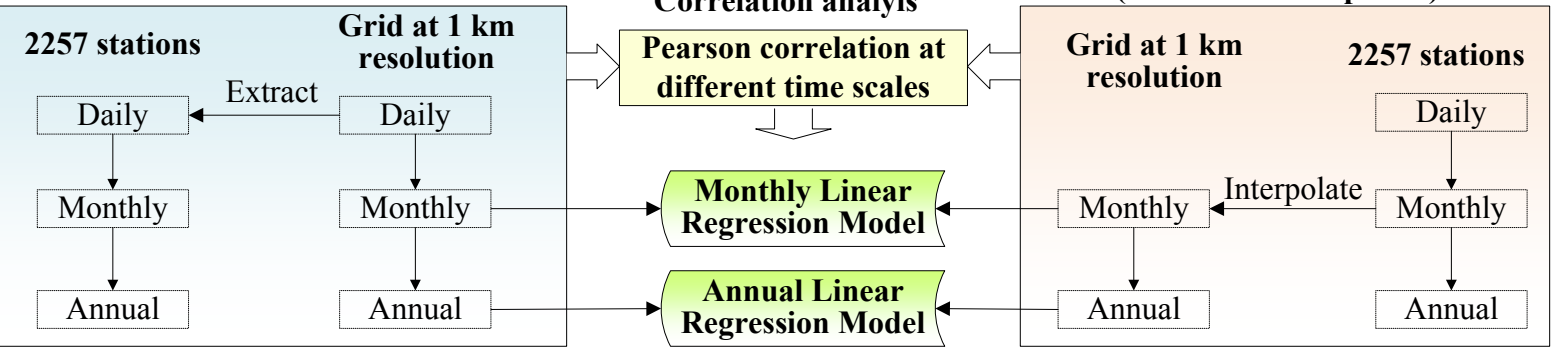

## 2 Linear Regression Models validation

TRMM precipitation in 2014

Corrected TRMM precipitation2

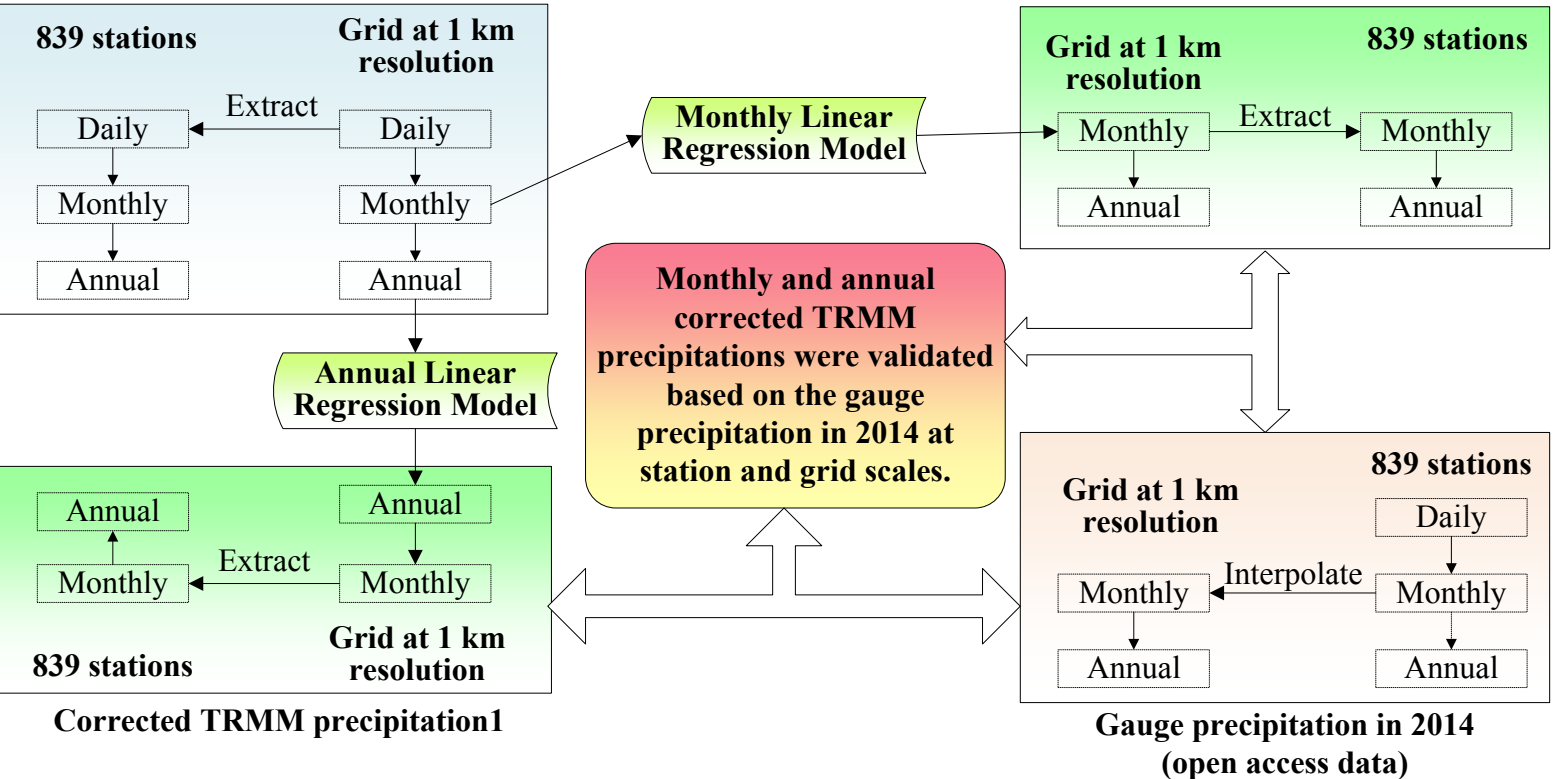

Supplement: f1 [file 3103749.f1.pdf]
